# Supplementary material for: Postharvest Treatment of Hydrogen Sulfide Delays the Softening of Chilean Strawberry Fruit by Downregulating the Expression of Key Genes Involved in Pectin Catabolism
Source: MDPI journal article supplement (doi:10.3390/ijms221810008), 2021-09-16
Supplement: s1 [file s1]

## Supplementary Material

**Table S1.** Changes in total cell wall material (AIR) content and pectins and hemicellulose fractions during the shelf-life period of Chilean strawberry fruit subjected to H<sub>2</sub>S treatment. The content of uronic acids (UA) of water-soluble (WSF), CDTA-soluble (CSF) and Na<sub>2</sub>CO<sub>3</sub>-soluble (NSF) pectin fractions and neutral sugars (NS) of KOH-soluble (KSF) fraction (hemicellulose) are indicated.

| Day | Treatment        | Cell Wall Material<br>(AIR)<br>(mg g <sup>-1</sup> FW) | Cell Wall Fractions (mg g <sup>-1</sup> AIR) |               |               |                |
|-----|------------------|--------------------------------------------------------|----------------------------------------------|---------------|---------------|----------------|
|     |                  |                                                        | WSF (UA)                                     | CSF (UA)      | NSF (UA)      | KSF (NS)       |
| 0   | Non-treated      | 13.90 ± 1.53                                           | 20.00 ± 0.88                                 | 6.38 ± 0.33   | 13.37 ± 2.42  | 10.09 ± 2.42   |
| 2   | H <sub>2</sub> S | 18.79 ± 1.17 a                                         | 18.21 ± 20.03 a                              | 2.01 ± 0.11 a | 9.10 ± 2.01 a | 11.03 ± 0.50 b |
|     | Control          | 18.50 ± 3.79 a                                         | 21.26 ± 1.17 a                               | 2.67 ± 0.39 a | 6.27 ± 0.74 a | 22.17 ± 6.85 a |
| 4   | H <sub>2</sub> S | 17.24 ± 1.77 b                                         | 26.28 ± 2.24 b                               | 1.61 ± 0.07 b | 7.49 ± 0.96 a | 14.79 ± 1.98 b |
|     | Control          | 26.95 ± 4.46 a                                         | 32.78 ± 1.00 a                               | 2.42 ± 0.20 a | 6.67 ± 0.76 a | 32.23 ± 4.30 a |
| 6   | H <sub>2</sub> S | 13.21 ± 2.03 b                                         | 39.75 ± 1.24 a                               | 2.39 ± 0.18 a | 8.92 ± 0.84 a | 19.26 ± 2.45 b |
|     | Control          | 24.72 ± 1.51 a                                         | 36.44 ± 2.24 b                               | 3.01 ± 0.36 a | 6.47 ± 0.43 b | 41.91 ± 3.27 a |

Data indicate the mean of three replicates ± S.D. Different letters indicate significant differences between treatments at each day ( $p \leq 0.05$ ). FW, fresh weight.
